# Supplementary material for: Coping with Drought: Perceptions, Intentions and Decision-Stages of South West England Households
Source: Springer Nature journal article supplement (doi:10.1007/s11269-018-2175-2), 2019-01-16
Supplement: MOESM1 [file 16401530]

**Supplementary Material**

**Section 2.0**

Table A

An outline of the relevant questions incorporated into the questionnaire survey that are of interest to this study

| Measured variables | Question typology | Scale |
| --- | --- | --- |
| Age | Age categories | 1=16-12; 2=24-34; 3=35-44; 4=45-54; 5=55-64; 6=75-74; 7=75+ |
| Gender | Participants’ gender | 1=female; 2=male |
| Income categories | Income placed in three categories - low, medium and high | 1=<£15,000-24,999; 3=£25,000-44,999; 3=£45,000+ |
| Education | Educational accomplishments | 1=no formal; 2=secondary; 3=vocational; 4=higher education |
| Household composition | Number of occupants | 1; 2; 3; 4; 5; 6+ |
| Housing status | Home ownership | 1=tenant; 2=owner |
| Drought likelihood | Drought: perception on likelihood of being affected by drought | 1=very low; 2=low; 3=medium; 4=high; 5=very high |
| Perceived consequences | Perceived consequences of a drought event for health, family, property and local area | 1=very low; 2=low; 3=medium; 4=high; 5=very high |
| Response efficacy | Household’s estimate of the effectiveness of the drought coping measure | 0=uncertain; 1=very ineffective; 2=ineffective; 3=somewhat effective; 4=effective; 5=very effective |
| Response costs | Agreement that financial or other costs (time and effort) would limit implementation of drought coping measure | 1=strongly disagree; 2=disagree; 3=neither agree nor disagree; 4=agree; 5=strongly agree |
| Self-efficacy | Agreement that the household capability to implement the coping measures would be limited by lack of knowledge, awareness, and skills/abilities | 1=strongly disagree; 2=disagree; 3=neither agree nor disagree; 4=agree; 5=strongly agree |
| Past drought experience | Drought experience - current address and or previous address | 0=never; 1=once, 2=twice; 3=three or more times |
| Other motivational variables | Agreement that coping measures would only be implemented if neighbours were doing, if legally required, if incentive available, and if severely affected by future drought | 1=strongly disagree; 2=disagree; 3=neither agree nor disagree; 4=agree; 5=strongly agree |
| Climate change linkages | Agreement about how climate change will influence drought frequency and intensity as well as other parameters such as temperature and flooding | 1=strongly disagree; 2=disagree; 3=neither agree nor disagree; 4=agree; 5=strongly agree |
| Sustainable water use | Agreement about sustainable water use | 1=strongly disagree; 2=disagree; 3=neither agree nor disagree; 4=agree; 5=strongly agree |
| Behavioural intentions | Household intentions to implement the recommended coping measure | 1=would not do; 2=uncertain; 3=plan to do; 4=already doing |

**Section 3.0**

Case study 1 – St. Thomas

St. Thomas is located on the western bank of the river Exe adjacent the city centre of Exeter in Devon. It is an administrative ward of Exeter with a population of over 6000 people but the area of interest, i.e. the flood risk zone, has just about 900 households (considering flood defense before upgrades began in 2015). Topsham, located on the Exe estuary, is also at risk of flooding from the river but largely from the high tides and the influence of prevailing winds. Its population consists of approximately 4000 people, but the flood zone has less than 100 households. Both communities have at least 40% of their population being over 50 years old reflecting an aging population. Exeter has mild wet winters and warm but variable summers with hot and cooler rainy spells. July is the warmest month (average high of 21.7 °C), January is the coldest (average high of 8.8 °C), and October is the wettest month with 88.9 millimetres of rain. Mean annual rainfall rate for the region ranges from between 800-1300 mm. The highest recorded temperature in Exeter is 33.5 °C which was recorded during the 1976 drought, whilst the lowest recorded temperature is −16.4 °C (December 2010) (<https://en.wikipedia.org/wiki/Exeter#Climate>).

In terms of water supply, ground-water is not a major contributor and accounts for less than 10% of the region’s available water resources. Phillips and McGregor (1998) further explain that the region experiences great seasonal variation in water demand, which can double in some seaside resorts during the summer holiday period, which is the region’s driest season. Despite these physical and social conditions, the region has a strategic three reservoir system that ensures water is available to different part when needed.

**Section 4.0**

Table B

Descriptive statistics of key socio-demographic and PMT variables used in the study (n=91 except income where n=62)

| **No.** | **Variables** | **Mean** | **Median** | **Std. Deviation** | **Skewness** | **Kurtosis** | **Minimum** | **Maximum** |
| --- | --- | --- | --- | --- | --- | --- | --- | --- |
| Socio-demographic variables | | | | | | | | |
|  | Age | 4.62 | 4.00 | 1.55 | -1.60 | 0.91 | 1.00 | 7.00 |
|  | Gender | 1.44 | 1.00 | 0.50 | 1.23 | -1.99 | 1.00 | 2.00 |
|  | Income categories | 2.13 | 2.00 | 0.76 | -1.22 | -1.20 | 1.00 | 3.00 |
|  | Education | 3.11 | 4.00 | 1.06 | -0.52 | -1.18 | 1.00 | 4.00 |
|  | Number in household | 2.53 | 2.00 | 1.22 | 0.73 | -0.14 | 1.00 | 6.00 |
|  | Housing status | 1.82 | 2.00 | 0.40 | -1.66 | 0.80 | 1.00 | 2.00 |
| 1 | Drought Likelihood | 1.98 | 2.00 | 0.85 | 0.61 | -0.20 | 1.00 | 4.00 |
| Drought consequences | | | | | | | | |
| 2 | Health | 2.20 | 2.00 | 0.96 | 0.30 | -0.54 | 1.00 | 5.00 |
| 3 | Local Area | 2.26 | 2.00 | 0.88 | 0.05 | -0.82 | 1.00 | 4.00 |
| 4 | Property | 2.08 | 2.00 | 0.73 | 0.05 | -0.70 | 1.00 | 4.00 |
| 5 | Family | 2.03 | 2.00 | 0.85 | 0.40 | -0.62 | 1.00 | 4.00 |
| Behavioural intentions towards implementation of drought coping measures | | | | | | | | |
| 6 | Water Butt | 3.10 | 3.00 | 0.95 | -0.88 | -0.04 | 1.00 | 4.00 |
| 7 | Storing Water at Home | 2.70 | 3.00 | 1.10 | -0.11 | -1.33 | 1.00 | 4.00 |
| 8 | Reusing Greywater | 2.30 | 3.00 | 1.04 | -0.16 | -1.13 | 1.00 | 4.00 |
| 9 | Recycled Water | 2.24 | 2.00 | 0.67 | -0.32 | -0.79 | 1.00 | 3.00 |
| 10 | Shorter Showers | 3.21 | 3.00 | 0.10 | -1.12 | 0.39 | 1.00 | 4.00 |
| 11 | Water Saving Devices | 3.04 | 3.00 | 0.90 | -0.41 | -0.80 | 1.00 | 4.00 |
| 12 | Hosepipe Ban | 3.40 | 3.00 | 0.66 | -0.85 | 0.70 | 1.00 | 4.00 |
| Efficacy of drought coping responses | | | | | | | | |
| 13 | Water Butt | 4.03 | 4.00 | 0.10 | -1.33 | 3.74 | 0.00 | 5.00 |
| 14 | Storing Water at Home | 3.60 | 4.00 | 1.20 | -0.94 | 0.93 | 0.00 | 5.00 |
| 15 | Reusing Greywater | 3.59 | 4.00 | 1.12 | -1.05 | 1.40 | 0.00 | 5.00 |
| 16 | Recycled Water | 3.01 | 3.00 | 1.50 | -0.61 | -0.38 | 0.00 | 5.00 |
| 17 | Shorter Showers | 3.55 | 4.00 | 1.30 | -1.10 | 1.04 | 0.00 | 5.00 |
| 18 | Water Saving Devices | 3.45 | 4.00 | 1.23 | -0.10 | 1.10 | 0.00 | 5.00 |
| 19 | Hose Pipe Ban | 3.75 | 4.00 | 0.98 | -0.61 | 0.03 | 1.00 | 5.00 |
| Response cost and self-efficacy | | | | | | | | |
| 20 | Money | 3.00 | 3.00 | 1.25 | 0.04 | -1.02 | 1.00 | 5.00 |
| 21 | Time and Effort | 2.82 | 3.00 | 1.24 | 0.27 | -0.94 | 1.00 | 5.00 |
| 22 | Abilities | 2.55 | 2.00 | 1.21 | 0.62 | -0.44 | 1.00 | 5.00 |
| 23 | Knowledge | 2.24 | 2.00 | 1.00 | 0.85 | 0.60 | 1.00 | 5.00 |
| 24 | Awareness | 2.21 | 2.00 | 1.10 | 0.93 | 0.23 | 1.00 | 5.00 |

Table C

Correlation matrix (using Spearman’s r) of the key social-psychological variables used in the research. (n=91 except income where n=62)

| Variables | 1 | 2 | 3 | 4 | 5 | 6 | 7 | 8 | 9 | 10 | 11 | 12 | 13 | 14 | 15 | 16 | 17 |
| --- | --- | --- | --- | --- | --- | --- | --- | --- | --- | --- | --- | --- | --- | --- | --- | --- | --- |
| 1. Gender | -- | 0.09 | -0.11 | -0.07 | -0.07 | -0.12 | -.05 | -0.17 | -.22* | -0.15 | 0.13 | -.02 | -.24* | 0.02 | 0.14 | -0.15 | -0.07 |
| 2. Age | -- | -- | -.34** | -.42** | .41** | -.30* | 0.07 | -0.09 | -.25* | -0.18 | -0.01 | -.02 | -.27* | 0.08 | -.09 | -.12 | -0.14 |
| 3. Education levels | -- | -- | -- | .36** | -0.18 | 0.09 | 0.04 | 0.06 | 0.14 | 0.08 | -0.03 | 0.10 | .44** | -0.04 | -.03 | 0.17 | 0.11 |
| 4. Annual household income | -- | -- | -- | -- | -0.09 | 0.12 | 0.00 | 0.10 | 0.04 | .26* | 0.01 | 0.05 | 0.15 | -0.03 | 0.11 | 0.12 | 0.13 |
| 5. Housing status | -- | -- | -- | -- | -- | 0.05 | 0.10 | 0.10 | -0.09 | -0.15 | -0.09 | 0.01 | -0.01 | 0.15 | 0.00 | -.14 | -0.06 |
| 6. Number in household | -- | -- | -- | -- | -- | -- | -.02 | 0.10 | -0.02 | 0.02 | 0.10 | -0.15 | 0.00 | -0.05 | 0.07 | 0.02 | 0.08 |
| 7. Drought likelihood local area | -- | -- | -- | -- | -- | -- | -- | .30* | 0.06 | -0.03 | -0.10 | 0.13 | 0.20 | -0.01 | 0.11 | 0.06 | 0.12 |
| 8. Drought consequences | -- | -- | -- | -- | -- | -- | -- | -- | .30* | -0.10 | -.28** | 0.10 | .224* | 0.04 | 0.16 | -0.08 | 0.20 |
| 9. Response efficacy | -- | -- | -- | -- | -- | -- | -- | -- | -- | -0.02 | -0.15 | 0.09 | 0.20 | .250* | 0.10 | 0.17 | .37** |
| 10. Self-efficacy | -- | -- | -- | -- | -- | -- | -- | -- | -- | -- | 0.02 | -0.18 | 0.02 | -.27** | 0.03 | 0.04 | -0.01 |
| 11. Response cost | -- | -- | -- | -- | -- | -- | -- | -- | -- | -- | -- | -0.18 | -0.07 | -0.04 | 0.03 | -0.04 | -.35** |
| 12. Drought experience | -- | -- | -- | -- | -- | -- | -- | -- | -- | -- | -- | -- | -0.06 | 0.10 | 0.05 | 0.15 | 0.20 |
| 13. Drought and climate change | -- | -- | -- | -- | -- | -- | -- | -- | -- | -- | -- | -- | -- | 0.01 | -0.02 | -0.07 | 0.10 |
| 14. Sustainable water use | -- | -- | -- | -- | -- | -- | -- | -- | -- | -- | -- | -- | -- | -- | 0.01 | 0.06 | 0.01 |
| 15. Incentives and subsidies | -- | -- | -- | -- | -- | -- | -- | -- | -- | -- | -- | -- | -- | -- | -- | 0.15 | .27* |
| 16. If badly affected in future drought | -- | -- | -- | -- | -- | -- | -- | -- | -- | -- | -- | -- | -- | -- | -- | -- | 0.08 |
| 17. Behavioural intentions | -- | -- | -- | -- | -- | -- | -- | -- | -- | -- | -- | -- | -- | -- | -- | -- | -- |

*. Correlation is significant at the 0.05 level (2-tailed).

**. Correlation is significant at the 0.01 level (2-tailed).


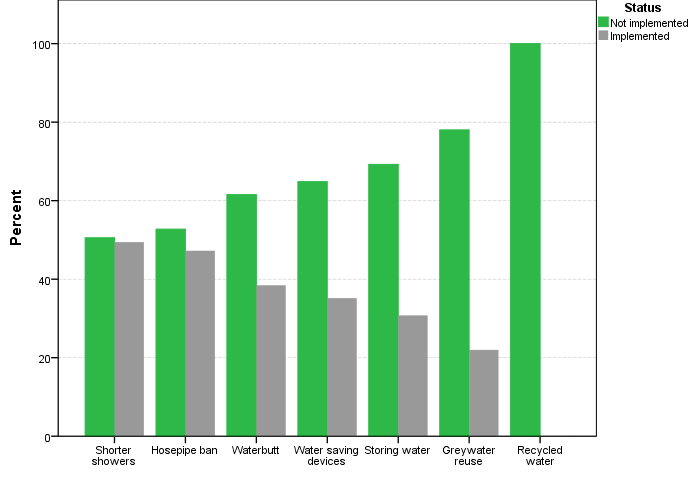


Fig A

Uptake of drought coping measures

Table D

Cross tabulation analysis of perceptions of the efficacy of hosepipe ban compared with intentions to implement along with results of the Chi-Square test of significance (n=91).

|  | | Adhering to hpb | | | | | Total |
| --- | --- | --- | --- | --- | --- | --- | --- |
| Very ineffective | Ineffective | Somewhat effective | Effective | Very Effective |
| Adhering to a hosepipe ban | Would not do | 1 | 0 | 0 | 0 | 0 | 1 |
| Undecided | 1 | 2 | 3 | 0 | 0 | 6 |
| Plan to do | 0 | 0 | 9 | 19 | 13 | 41 |
| Already doing | 0 | 6 | 10 | 19 | 8 | 43 |
| Total | | 2 | 8 | 22 | 38 | 21 | 91 |

| **Chi-Square Tests** | | | |
| --- | --- | --- | --- |
|  | Value | df | Asymptotic Significance (2-sided) |
| Pearson Chi-Square | 68.687a | 12 | .000 |
| Likelihood Ratio | 35.327 | 12 | .000 |
| Linear-by-Linear Association | 3.071 | 1 | .080 |
| N of Valid Cases | 91 |  |  |
| a. 14 cells (70.0%) have expected count less than 5. The minimum expected count is .02. | | | |

Table E

Descriptive statistics for cluster 1 (contemplatives) participants

|  | | **Drought likelihood** | **Consequences** | **Response efficacy** | **Self-efficacy** | **Response cost** | **Sustainable water use practices** | **Past experience** | **Incentive or subsidy** | **If badly affected in future drought** | **Drought and climate change** | **Behavioural intentions** |
| --- | --- | --- | --- | --- | --- | --- | --- | --- | --- | --- | --- | --- |
| Mean | | 1.89 | 1.91 | 3.22 | 2.39 | 3.76 | 4.05 | 0.61 | 3.51 | 3.71 | 3.28 | 2.43 |
| Median | | 2.00 | 1.88 | 3.33 | 2.00 | 3.75 | 4.00 | 0.00 | 4.00 | 4.00 | 3.25 | 2.50 |
| Std. Deviation | | 0.62 | 0.62 | 0.94 | 0.95 | 0.75 | 0.84 | 0.82 | 1.15 | 1.27 | 0.76 | 0.52 |
| Skewness | | 0.07 | 0.31 | -0.85 | 0.79 | 0.12 | -1.27 | 1.18 | -0.68 | -0.58 | -0.01 | -0.43 |
| Std. Error of Skewness | | 0.39 | 0.38 | 0.38 | 0.38 | 0.38 | 0.38 | 0.38 | 0.39 | 0.38 | 0.38 | 0.38 |
| Kurtosis | | -0.28 | -0.71 | 1.74 | 0.41 | -0.90 | 3.43 | 0.55 | -0.01 | -0.83 | -0.69 | 0.33 |
| Std. Error of Kurtosis | | 0.77 | 0.75 | 0.75 | 0.75 | 0.75 | 0.75 | 0.75 | 0.76 | 0.75 | 0.75 | 0.75 |
| Minimum | | 1.00 | 1.00 | 0.17 | 1.00 | 2.50 | 1.00 | 0.00 | 1.00 | 1.00 | 2.00 | 1.00 |
| Maximum | | 3.00 | 3.00 | 4.83 | 5.00 | 5.00 | 5.00 | 3.00 | 5.00 | 5.00 | 5.00 | 3.50 |
| Percentiles | 25 | 1.25 | 1.46 | 2.67 | 1.50 | 3.00 | 4.00 | 0.00 | 3.00 | 3.00 | 2.50 | 2.13 |
| 50 | 2.00 | 1.88 | 3.33 | 2.00 | 3.75 | 4.00 | 0.00 | 4.00 | 4.00 | 3.25 | 2.50 |
| 75 | 2.00 | 2.25 | 3.88 | 3.00 | 4.50 | 5.00 | 1.00 | 4.00 | 5.00 | 4.00 | 2.83 |

Table F

Descriptive statistics for cluster 2 (responsives ) participants

|  | | **Drought likelihood** | **Consequences** | **Response efficacy** | **Self-efficacy** | **Response cost** | **Sustainable water use practices** | **Past experience** | **Incentive or subsidy** | **If badly affected in future drought** | **Drought and climate change** | **Behavioural intentions** |
| --- | --- | --- | --- | --- | --- | --- | --- | --- | --- | --- | --- | --- |
| Mean | | 2.04 | 2.29 | 3.77 | 2.39 | 2.25 | 4.15 | 0.89 | 3.82 | 3.85 | 3.46 | 3.07 |
| Median | | 2.00 | 2.25 | 3.83 | 2.50 | 2.00 | 4.00 | 1.00 | 4.00 | 4.00 | 3.50 | 3.17 |
| Std. Deviation | | 0.98 | 0.70 | 0.59 | 0.88 | 0.59 | 0.75 | 1.03 | 1.06 | 1.11 | 0.85 | 0.42 |
| Skewness | | 0.56 | 0.28 | -0.13 | 0.47 | -0.29 | -0.84 | 1.11 | -0.47 | -0.49 | -0.34 | -0.49 |
| Std. Error of Skewness | | 0.33 | 0.33 | 0.33 | 0.33 | 0.33 | 0.33 | 0.33 | 0.34 | 0.33 | 0.33 | 0.33 |
| Kurtosis | | -0.71 | 0.13 | 0.12 | 0.35 | -0.09 | 1.02 | 0.62 | -0.97 | -1.10 | 0.26 | -0.03 |
| Std. Error of Kurtosis | | 0.64 | 0.64 | 0.64 | 0.64 | 0.64 | 0.65 | 0.64 | 0.66 | 0.65 | 0.64 | 0.64 |
| Minimum | | 1.00 | 1.00 | 2.50 | 1.00 | 1.00 | 2.00 | 0.00 | 2.00 | 2.00 | 1.00 | 1.83 |
| Maximum | | 4.00 | 4.00 | 5.00 | 5.00 | 3.50 | 5.00 | 4.00 | 5.00 | 5.00 | 5.00 | 3.83 |
| Percentiles | 25 | 1.00 | 1.75 | 3.33 | 2.00 | 2.00 | 4.00 | 0.00 | 3.00 | 3.00 | 3.00 | 2.67 |
| 50 | 2.00 | 2.25 | 3.83 | 2.50 | 2.00 | 4.00 | 1.00 | 4.00 | 4.00 | 3.50 | 3.17 |
| 75 | 3.00 | 2.75 | 4.00 | 3.00 | 2.50 | 5.00 | 1.00 | 5.00 | 5.00 | 4.00 | 3.33 |

**Section 5.0**

Figure B

Distribution of socio-demographic variables of contemplatives (Cluster 1) and responsives (Cluster 2)
